# Supplementary material for: Secondary calcification and dissolution respond differently to future ocean conditions
Source: Copernicus journal article supplement (doi:10.5194/bg-12-567-2015), 2015-01-29
Supplement: Supplementary file 7 [file bg-12-567-2015-supplement-cover-letter.pdf › bg-12-567-2015-supplement-cover-letter.pdf]

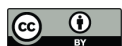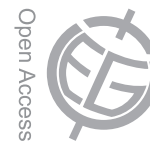

## *Supplement of*

# **Secondary calcification and dissolution respond differently to future ocean conditions**

**N. J. Silbiger and M. J. Donahue**

*Correspondence to:* N. J. Silbiger ([silbiger@hawaii.edu](mailto:silbiger@hawaii.edu))

- [bg-12-567-2015-supplement-cover-letter.pdf](#)
- [F S1.pdf](#)
- [F S2.pdf](#)
- [F S3.pdf](#)
- [F S4.pdf](#)
- [F S5.pdf](#)
- [F S6.pdf](#)
- [SilbigerAndDonahueFinalSupplement\\_Submitted.docx](#)
