# Supplementary figures and images for: Secondary calcification and dissolution respond differently to future ocean conditions
Source: Copernicus journal article supplement (doi:10.5194/bg-12-567-2015), 2015-01-29

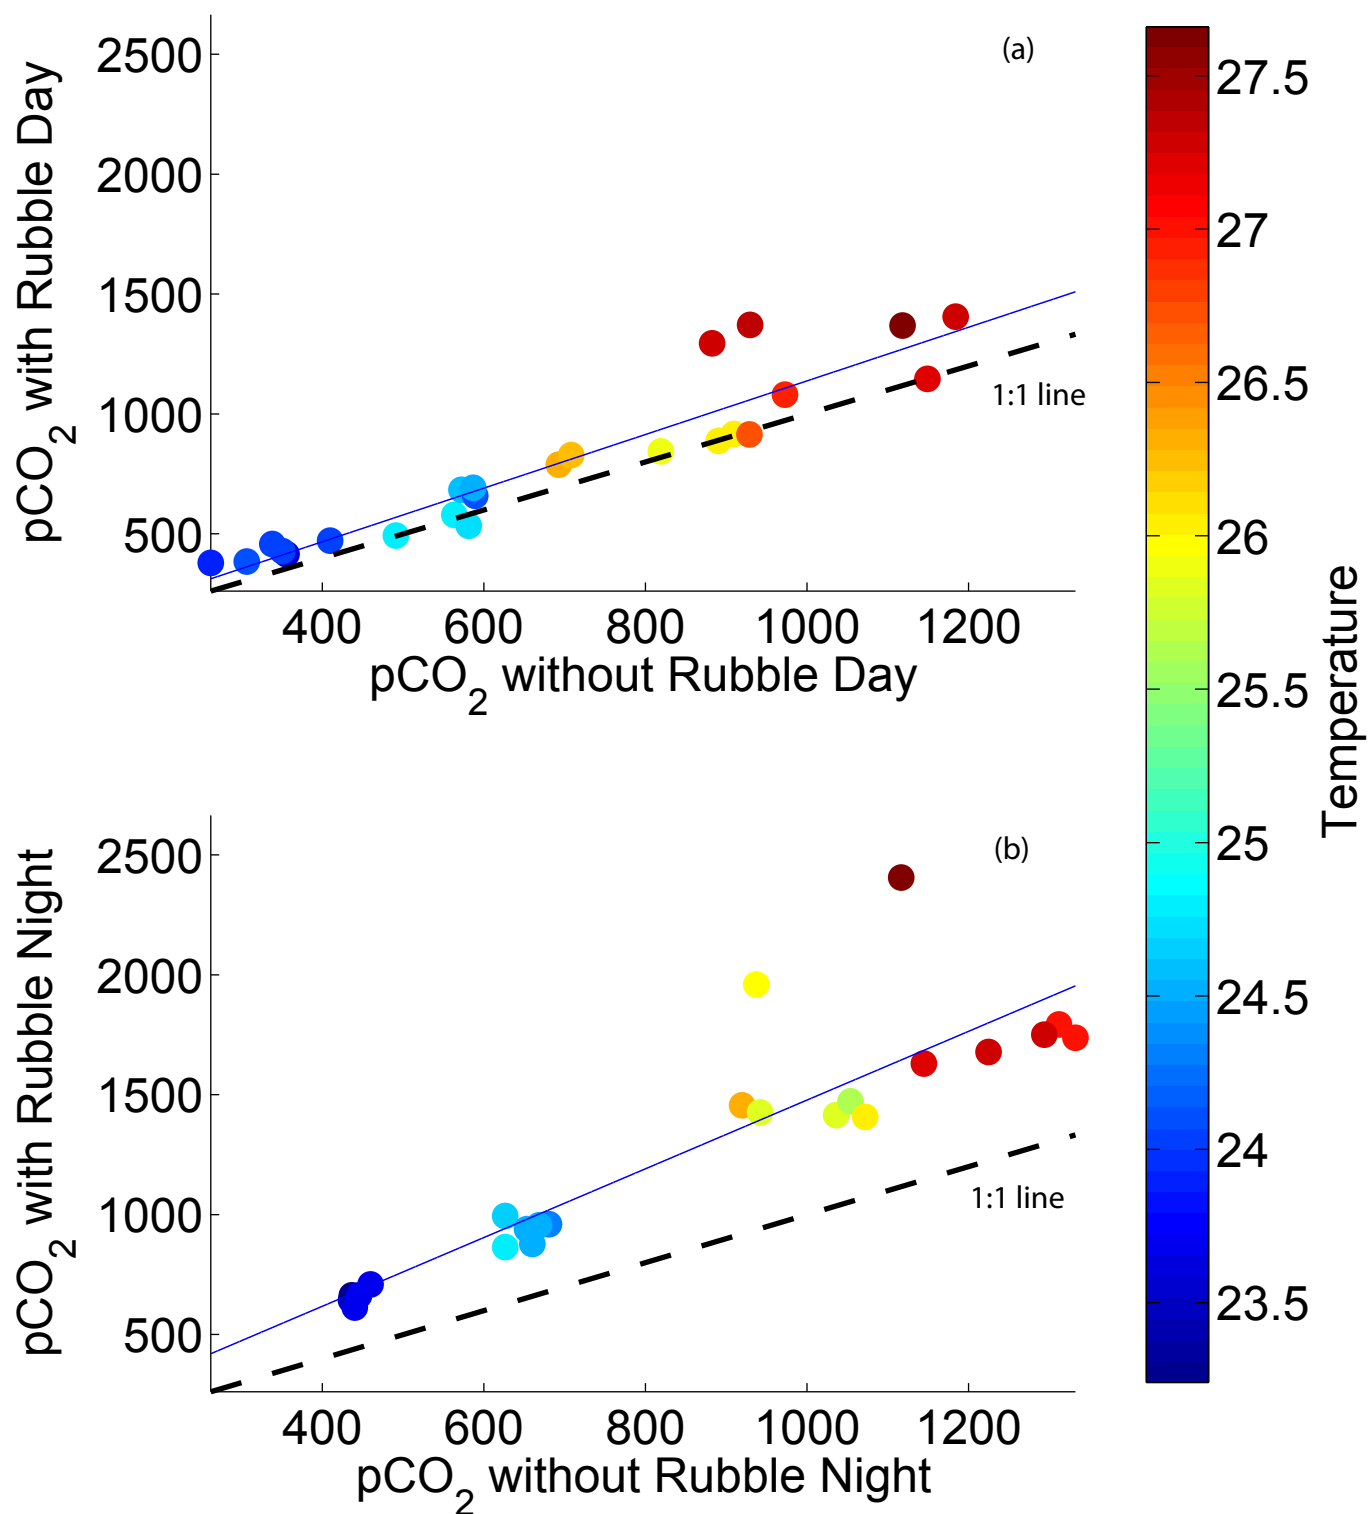

Supplement: Supplementary file 1 [file F S1.pdf › F S1.pdf]

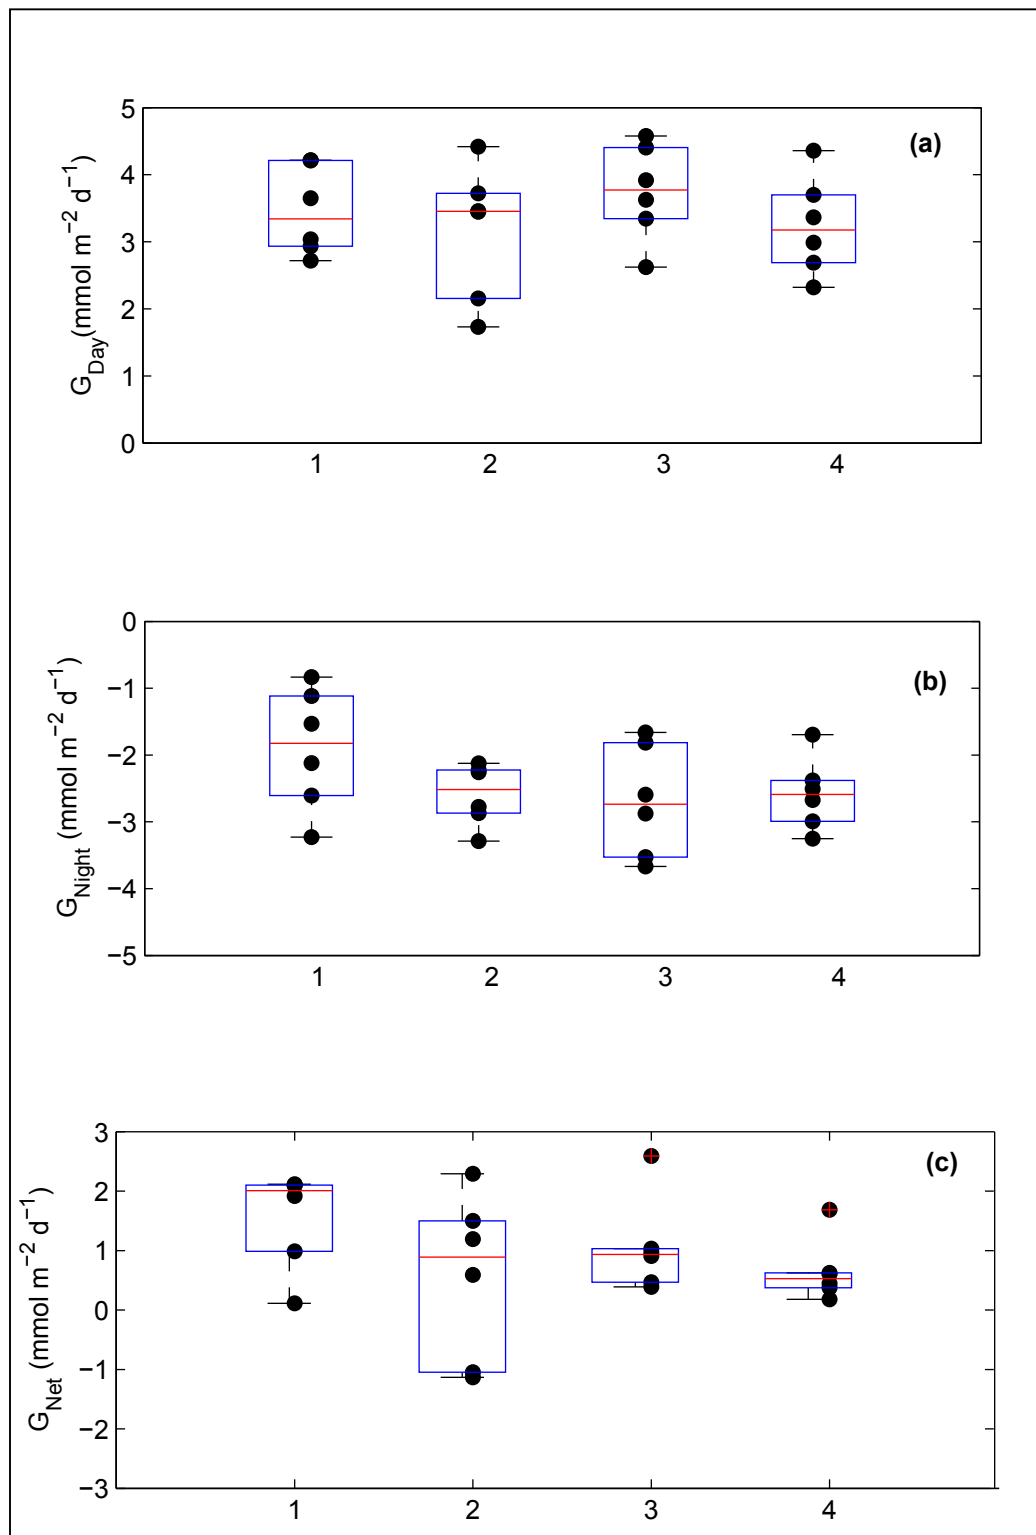

Supplement: Supplementary file 2 [file F S2.pdf › F S2.pdf]

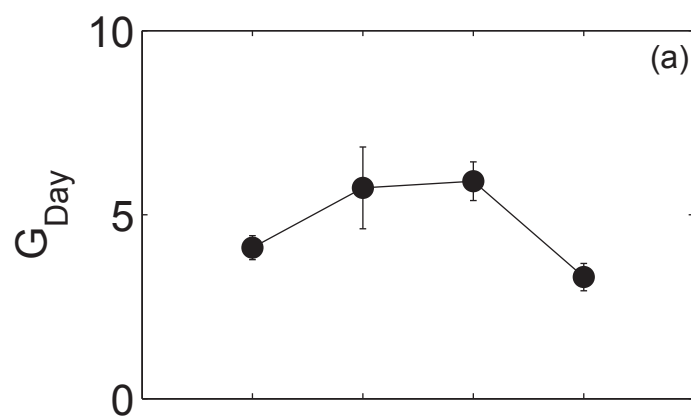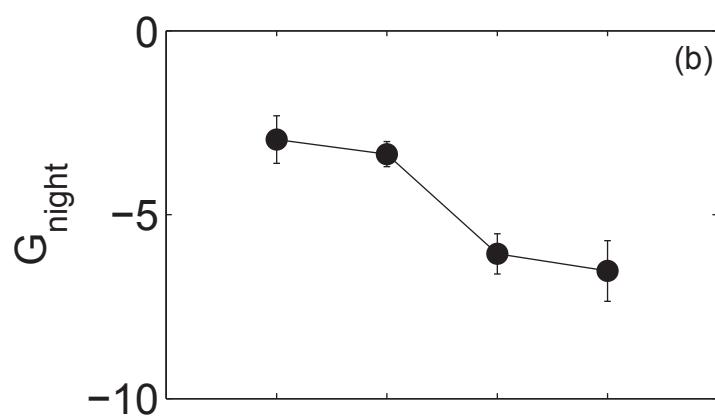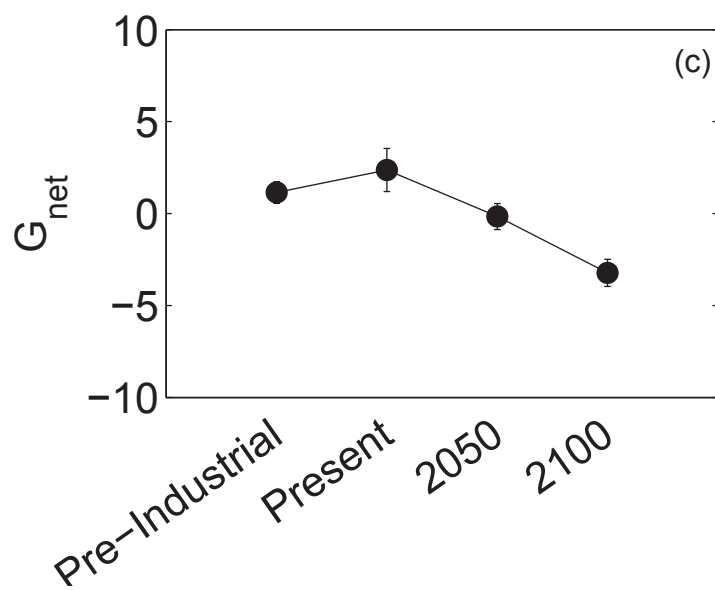

Supplement: Supplementary file 3 [file F S3.pdf › F S3.pdf]

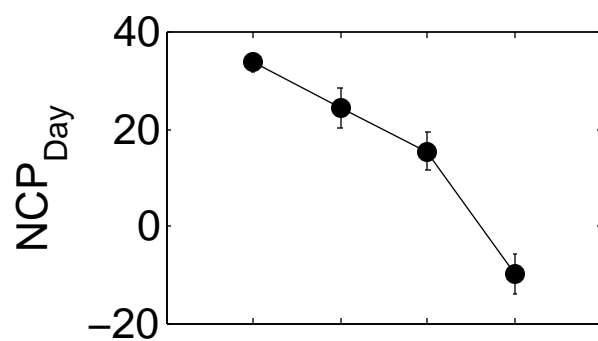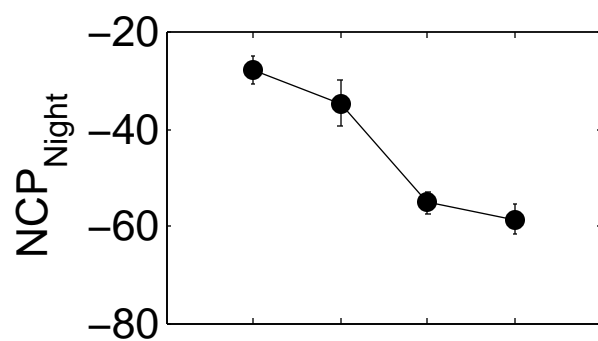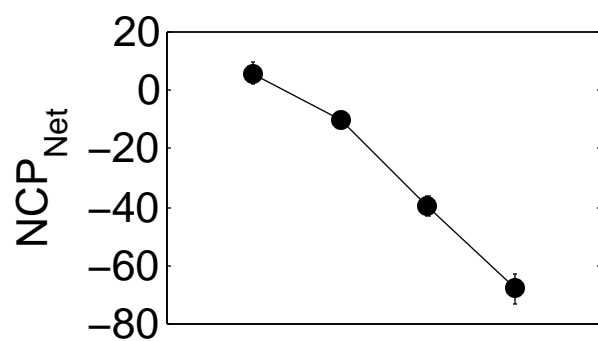

Pre-Industrial  
Present  
2050  
2100

Supplement: Supplementary file 4 [file F S4.pdf › F S4.pdf]

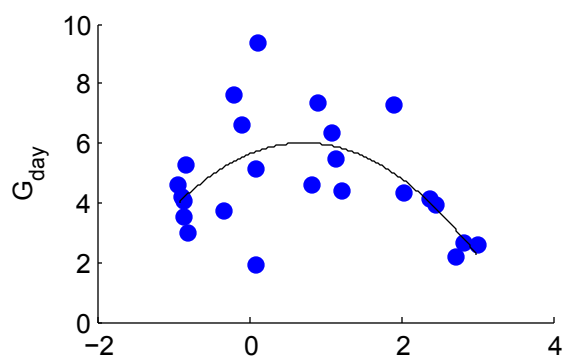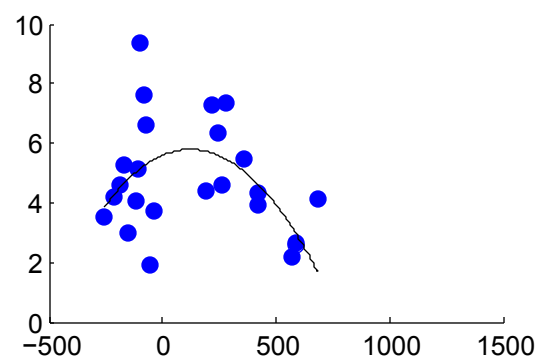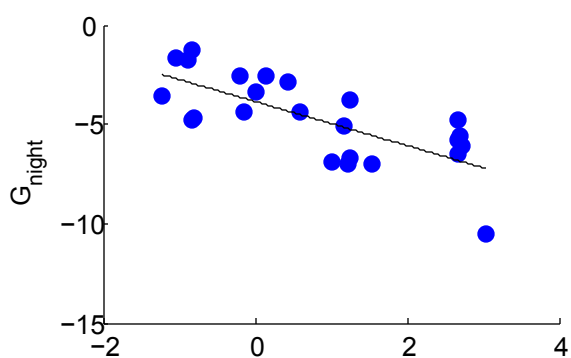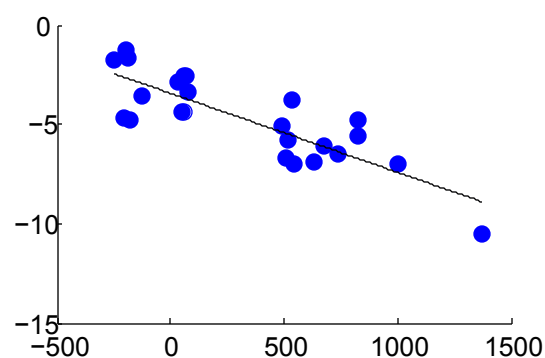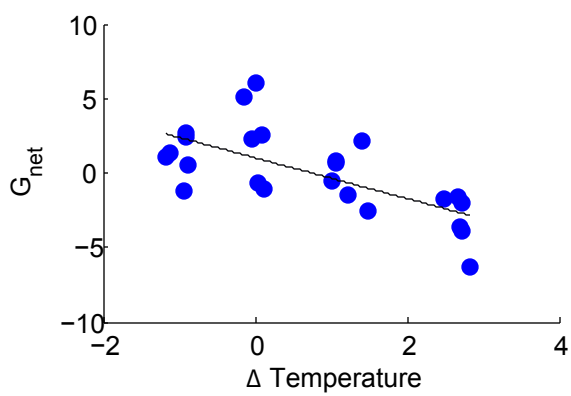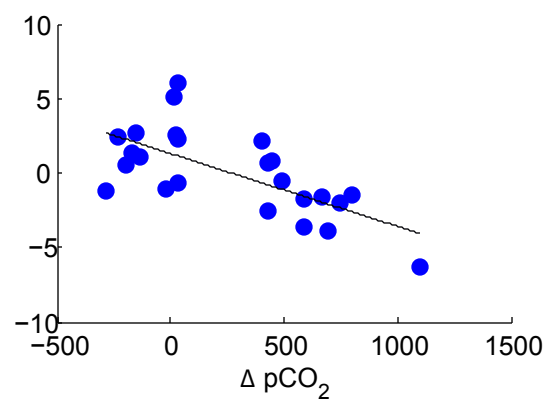

Supplement: Supplementary file 5 [file F S5.pdf › F S5.pdf]

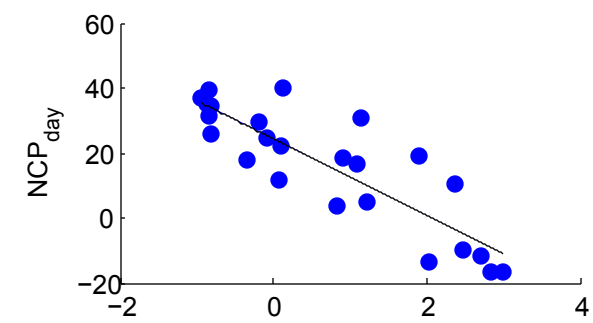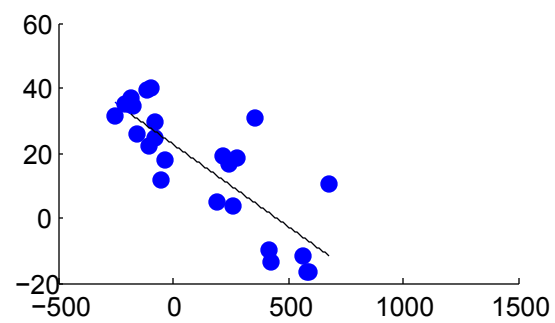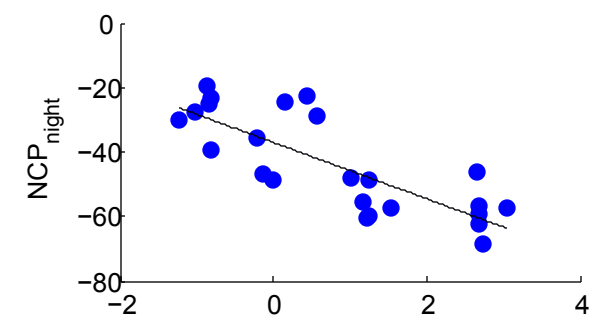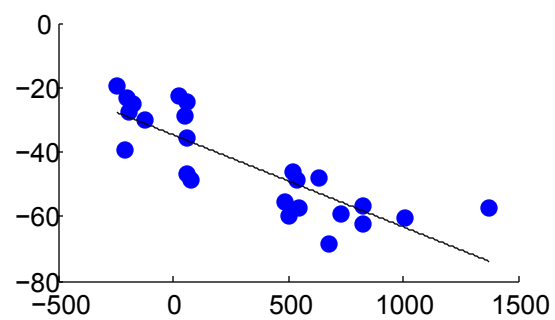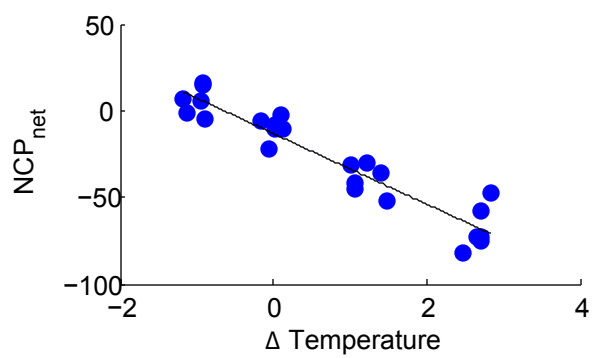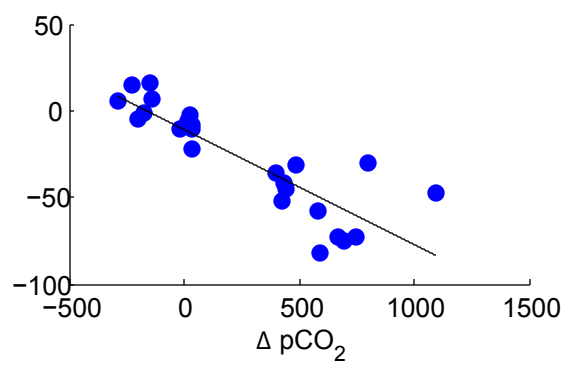

Supplement: Supplementary file 6 [file F S6.pdf › F S6.pdf]
